# Supplementary material
Source: MDPI journal article supplement (https://www.mdpi.com/2673-9992/14/1/98)
Supplement: s1 [file s1]

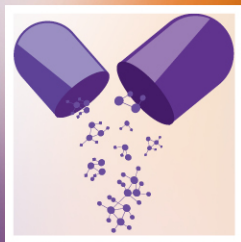

# The 8th International Electronic Conference on Medicinal Chemistry (ECMC 2022)

01-30 NOVEMBER 2022 | ONLINE

## YAMACS: a graphical interface for GROMACS

Chaired by **DR. ALFREDO BERZAL-HERRANZ**;  
Co-Chaired by **PROF. DR. MARIA EMÍLIA SOUSA**

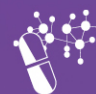

*pharmaceuticals*

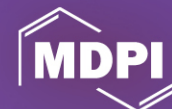

**Arkadeep Sarkar<sup>1,\*</sup>, Lucia Sessa<sup>1</sup>, Luigi Di Biasi<sup>2</sup> and Stefano Piotto<sup>1,3</sup>**

<sup>1</sup> Department of Pharmacy, University Of Salerno, Fisciano, SA 84084, Italy

<sup>2</sup> Department of Computer Science University Of Salerno, Fisciano, SA 84084, Italy

<sup>3</sup> Bionam Center for Biomaterials, University of Salerno, Fisciano, SA 84084, Italy

\* Corresponding author: [asarkar@unisa.it](mailto:asarkar@unisa.it)

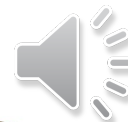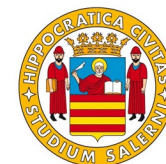

# YAMACS: a graphical interface for GROMACS

## Graphical Abstract

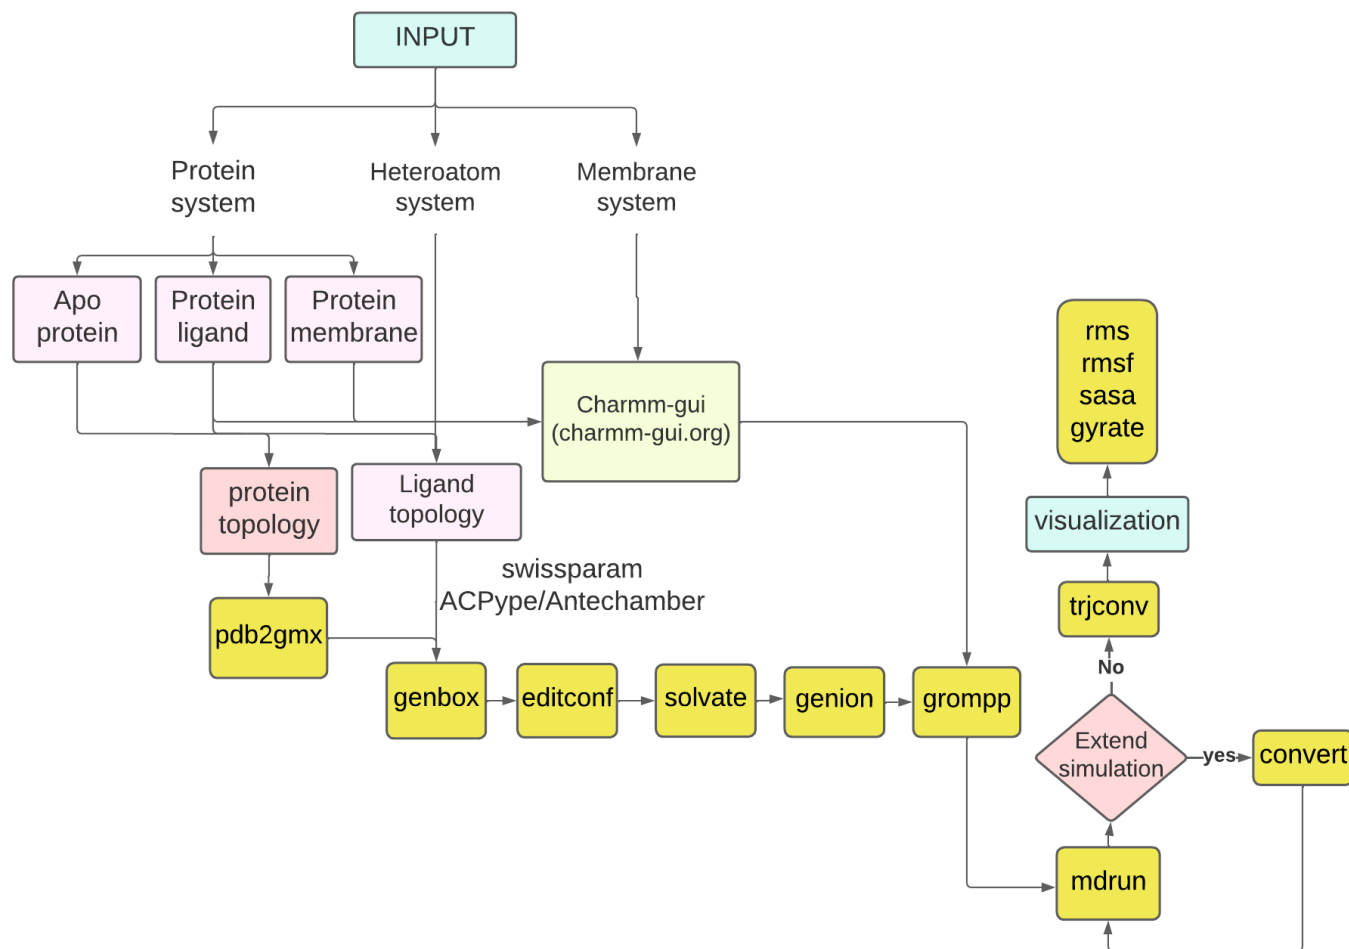

## Abstract:

Molecular dynamics (MD) is a powerful tool used to study the evolution of molecular systems and predict their properties. GROMACS is a famous MD tool that runs from the command line with user-provided configuration files. However, **the absence of a graphical user interface (GUI) of GROMACS and proper protocol to develop the input files** prevent the researcher from visualizing the MD trajectory in a real-time manner and addressing the structural problem. This issue was addressed by developing **YAMACS: a graphical user interface of GROMACS for the YASARA molecular graphics suite**. YAMACS automatizes several steps of input file preparation and **allows visualizing MD trajectory in real time**. In addition, a collaborative platform is created on the Git-hub page **to build an open community** of users and developers, extend the functionalities of YAMACS and improve the quality of computational drug design studies.

**Keywords:** Molecular dynamics, GROMACS, YAMACS

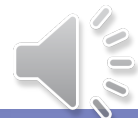

# Introduction

- GROMACS is a renowned, freely available tool to perform the MD simulation. However, the absence of a graphical user interface (GUI) can distract the researcher from addressing the chemical or biological problem from GROMACS.
- YAMACS<sup>1</sup> is the Python-based YASARA Plugin suit is developed to perform the MD simulation by using GROMACS through the GUI of the YASARA molecular viewer. In addition, the suite allows the interactive display of MD simulations, a feature absent in GROMACS.

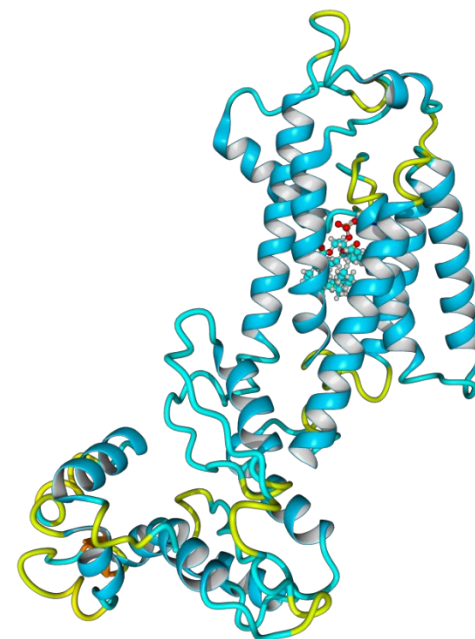

Figure 1: SMS1/POPC complex structure<sup>2</sup>

For more information, please visit the page:

<https://academic.oup.com/bioinformatics/article/38/19/4645/6673904>

1. Sarkar A. et al. YAMACS: a graphical interface for GROMACS. *Bioinformatics*. 2022 Oct 1;38(19):4645-6.

2. Sessa L. et al. (2021) Hydroxylated fatty acids: the role of the sphingomyelin synthase and the origin of selectivity. *Membranes*, 11, 787.

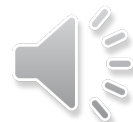

# Discussion

Preparing the simulation environment may still be complex, and users may encounter errors to resolve.

Developers and experts can modify the plugins by a fork from the Git-Hub page (<https://github.com/YAMACS-SML/YAMACS>). However, many versions of YAMACS would confuse the users to get access.

A Git-hub community is therefore essential to invite all the users and experts under the same roof for discussion. Currently the platform is the YAMACS Git-hub discussion page (<https://github.com/YAMACS-SML/YAMACS/discussions>). The platform is divided into two major categories:

- Users
- Developers

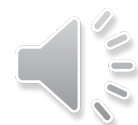

**ECMC  
2022**

**The 8th International Electronic  
Conference on Medicinal Chemistry**

**01-30 NOVEMBER 2022 | ONLINE**

# Discussion

The preparation of the simulation environment may still be complex, and users may encounter errors to resolve.

Developers and experts can modify the plugins by doing fork from the Git-Hub page (<https://github.com/YAMACS-SML/YAMACS>) . But so many version of YAMACS will confuse the users to get access.

A Git-hub community is therefore essential to invite all the users and experts under the same roof for discussion. Currently, the platform is the YAMACS Git-hub discussion page (<https://github.com/YAMACS-SML/YAMACS/discussions>). The platform is divided into two major categories:

- Users
- Developers

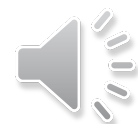

**ECMC**  
**2022**

**The 8th International Electronic  
Conference on Medicinal Chemistry**

01-30 NOVEMBER 2022 | ONLINE

# Discussion

## Users

- Notify a bug or error of YAMACS plugins.
- Contribute with plugins.

## Developers

- Notify a bug or error.
- Contribute with plugins and check the existing plugins.
- Authorize the new plugins.
- Authorize the experts.

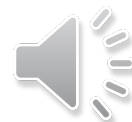

# Conclusion

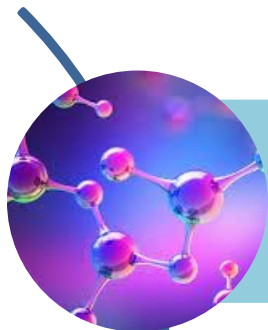

YAMACS provides a graphical interface to GROMACS and has been designed with maximum ease of use. The tool can automatize several steps of MD simulation and helps the user to perform the MD with less complication.

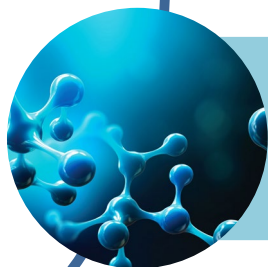

A global community of all YAMACS users and developers is created on the Git-hub discussion page to monitor and improve the quality of the YAMACS. That will increase the applicability of YAMACS MD simulation to the researchers and motivate them to develop new drugs through computational drug design studies.

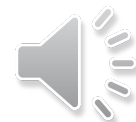

**ECMC**  
**2022**

**The 8th International Electronic  
Conference on Medicinal Chemistry**

01-30 NOVEMBER 2022 | ONLINE



# Acknowledgments

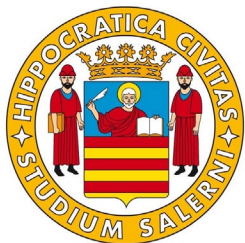

The authors are grateful to University of Salerno, Italy for funding this work.

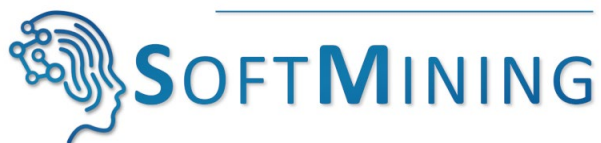

We are thankful to SoftMining for the use of their computing platform

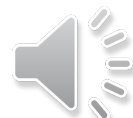

**ECMC  
2022**

**The 8th International Electronic  
Conference on Medicinal Chemistry**

01-30 NOVEMBER 2022 | ONLINE
